# Supplementary material
Source: PubMed Central journal article supplement (PMC4102924)
Supplement: NIHMS588330-supplement-Ferriero_Supplemental.pdf [file NIHMS588330-supplement-Ferriero_Supplemental.pdf]

## Supplementary Materials

### Phenylbutyrate Therapy for Pyruvate Dehydrogenase Complex Deficiency and Lactic Acidosis

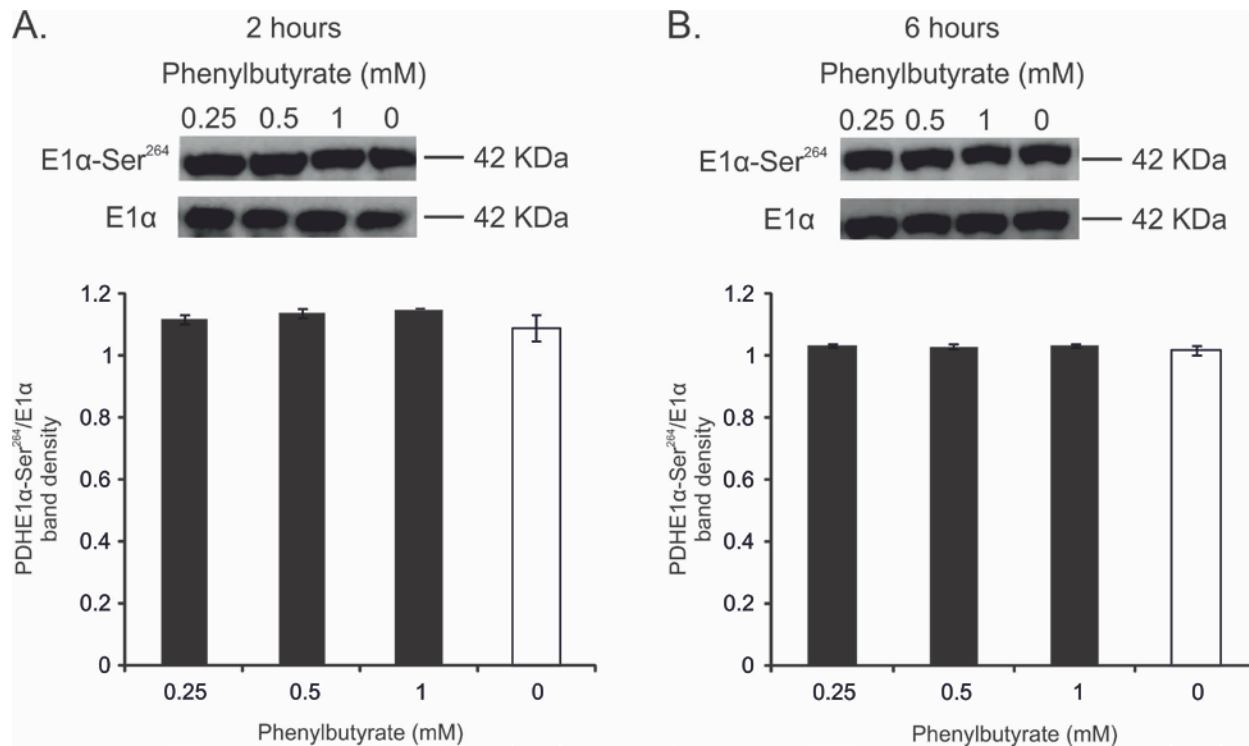

**Fig. S1. PDHC phosphorylation after phenylbutyrate incubation for 2 and 6 hours in human wild-type fibroblasts.** Western blotting of BA1054 fibroblasts treated with 0.25 mM, 0.5 mM, or 1 mM of phenylbutyrate or untreated, for 2 hours (A) or 6 hours (B). The average band intensities of phosphorylated E1 normalized for total E1 from two independent experiments are shown.

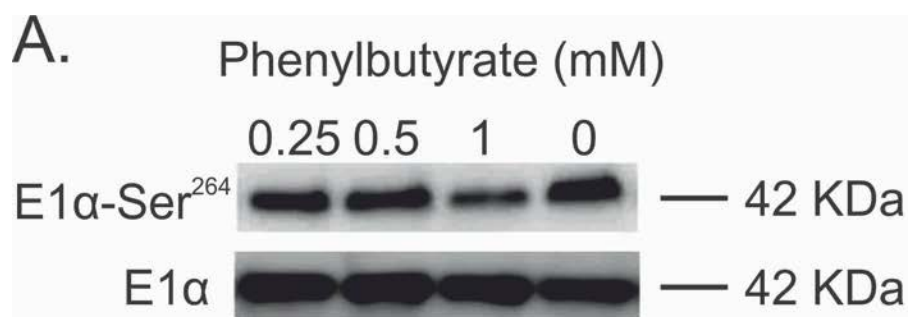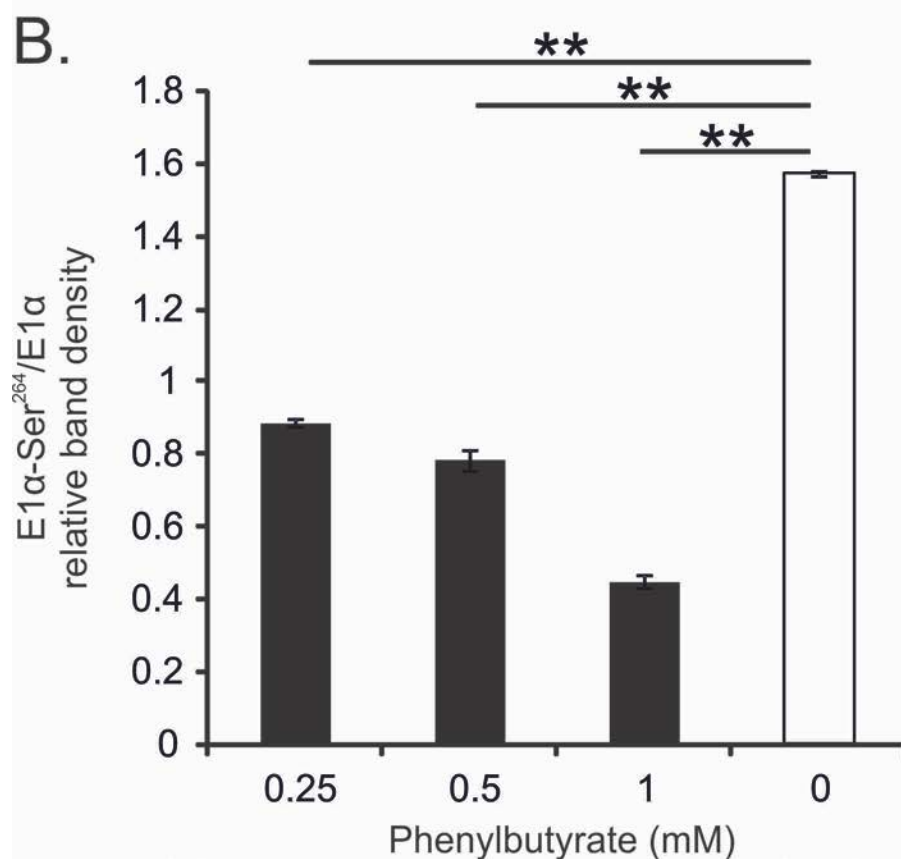

**Fig. S2. PDHC phosphorylation after drug treatment of human wild-type fibroblasts. A.**

Western blotting of BA1020 fibroblasts treated with 0.25 mM, 0.5 mM, or 1 mM of phenylbutyrate for 24 hours or untreated. The images shown in (A) are representative of two independent experiments. **B.** The average band intensities of phosphorylated E1 normalized for total E1 from two independent experiments are shown. \*\*:  $p < 0.01$ .

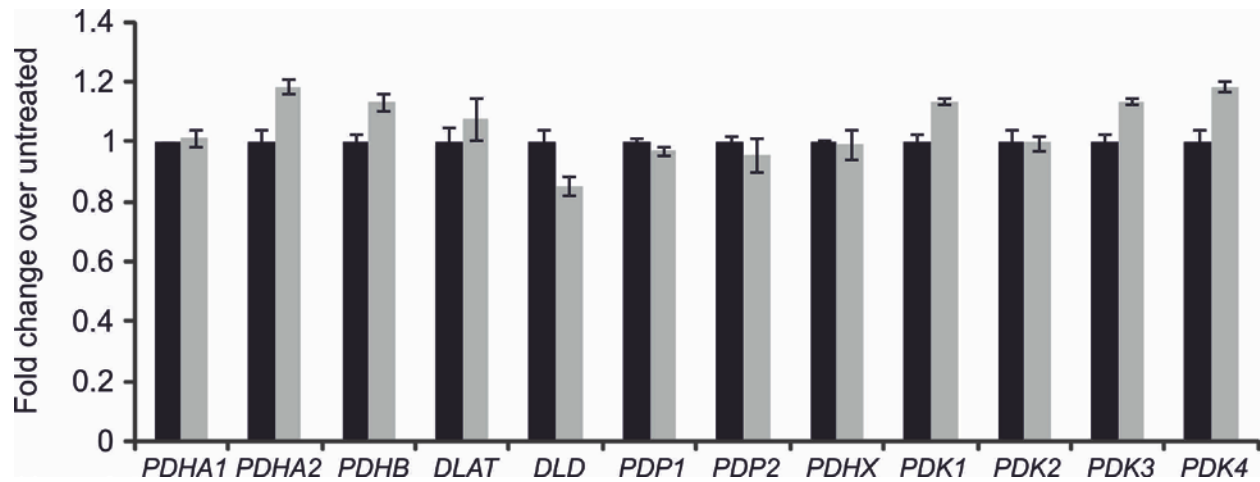

**Fig. S3. Expression of PDHC subunits and regulatory enzymes in fibroblasts.** RNA concentrations of the subunits (*PDHA1*, *PDHA2*, *PDHB*, *DLAT*, *DLD*, *PDHX*), kinases (*PDK1*, *PDK2*, *PDK3*, *PDK4*), and phosphatases (*PDP1* and *PDP2*) of PDHC in untreated (black bars) vs. phenylbutyrate-treated (gray bars) wild-type fibroblasts (n=3 per group). Means  $\pm$  standard deviations are shown.

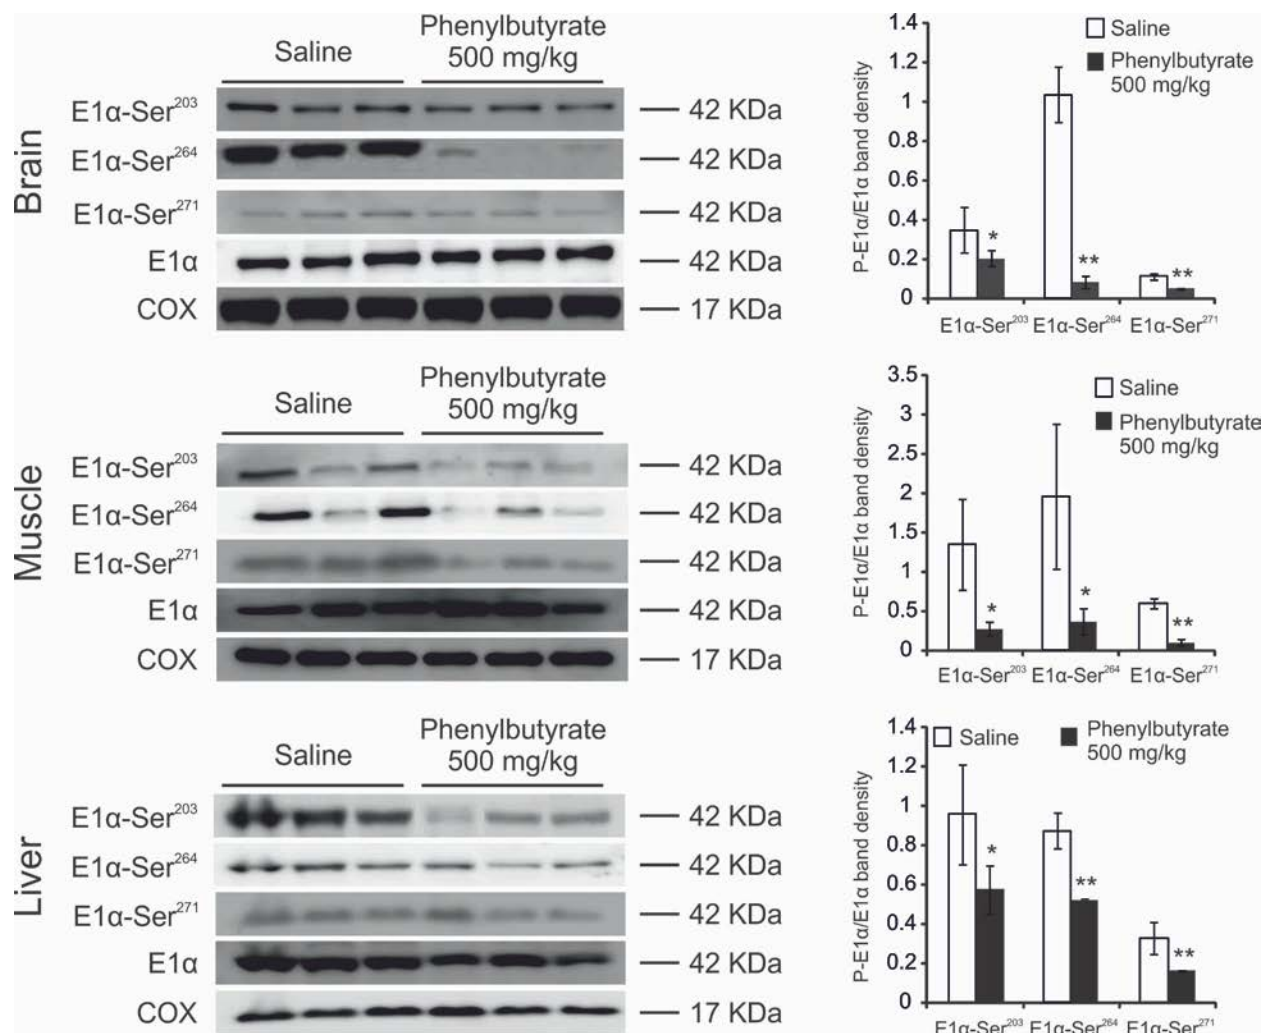

**Fig. S4. PDHC phosphorylation status in mouse tissues.** Western blot analyses of brain, muscle, and liver mitochondrial extract were performed with antibodies against the phosphorylated form of E1α. Three representative mice treated with 500 mg/kg/day of phenylbutyrate and another three treated with saline are shown. Each lane corresponds to the brain, muscle, or liver mitochondrial extract from an independent mouse. The phosphorylated form of E1α is significantly reduced in phenylbutyrate-treated mice as compared to the saline-treated mice. The amount of total E1 protein and COX proteins was similar in the two groups.

The graphs show densitometric quantification of n=5 mice from each treatment group. Means  $\pm$  standard deviations are shown. \*p<0.05; \*\*p<0.01.

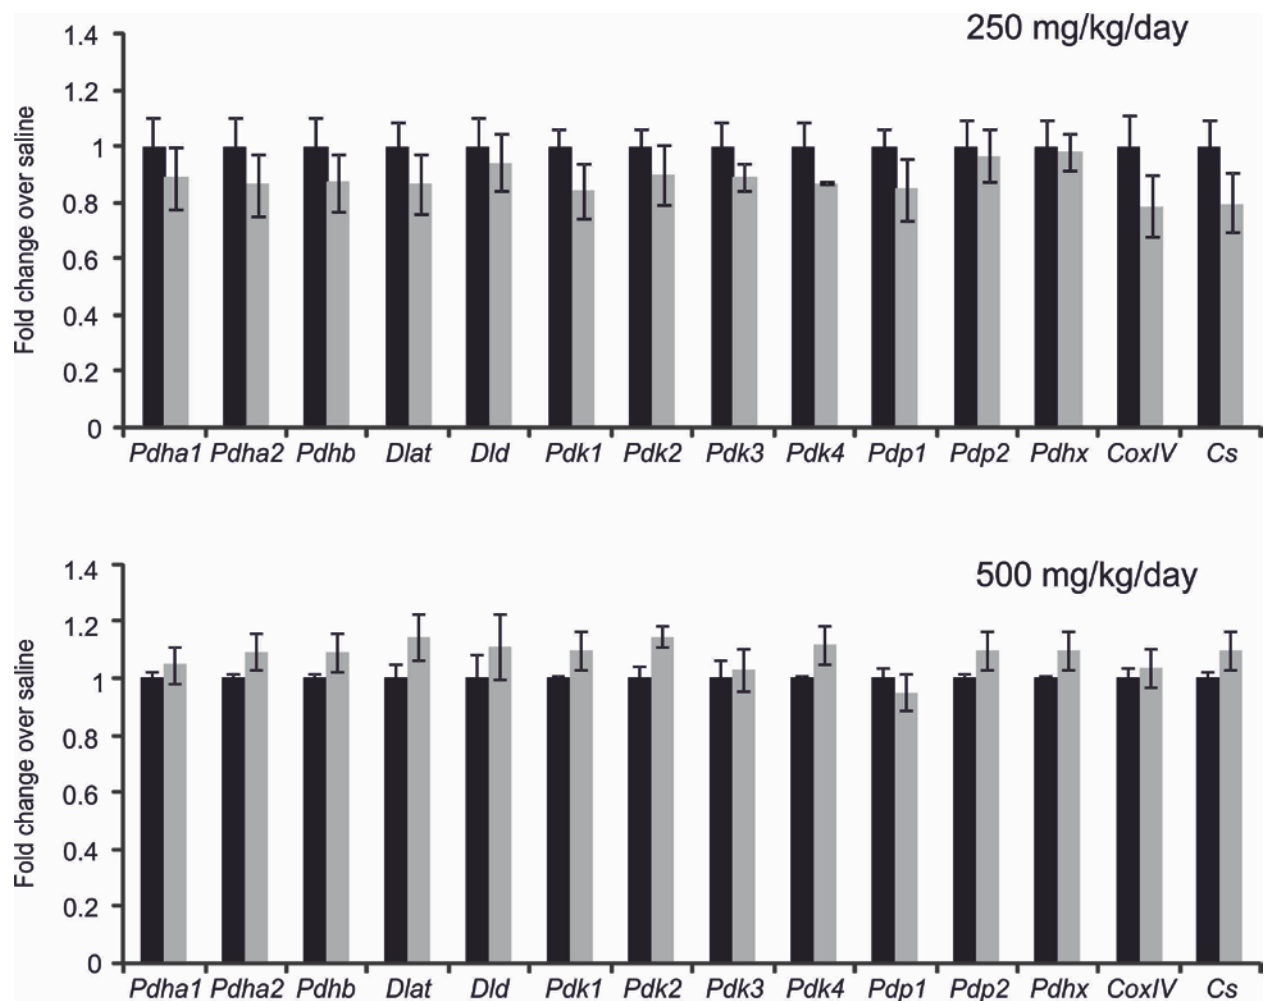

**Fig. S5. Expression of PDHC subunits and regulatory enzymes in brain. RNA**

concentrations of the subunits (*Pdha1*, *Pdha2*, *Pdhb*, *Dlat*, *Dld*, *Pdhx*), kinases (*Pdk1*, *Pdk2*, *Pdk3*, *Pdk4*), and phosphatases (*Pdp1* and *Pdp2*) of PDHC, *CoxIV*, and citrate synthase (*Cs*) in the brains of mice treated with 250 or 500 mg/kg/day of phenylbutyrate or with saline (n=5 per group). Means  $\pm$  standard deviations are shown.

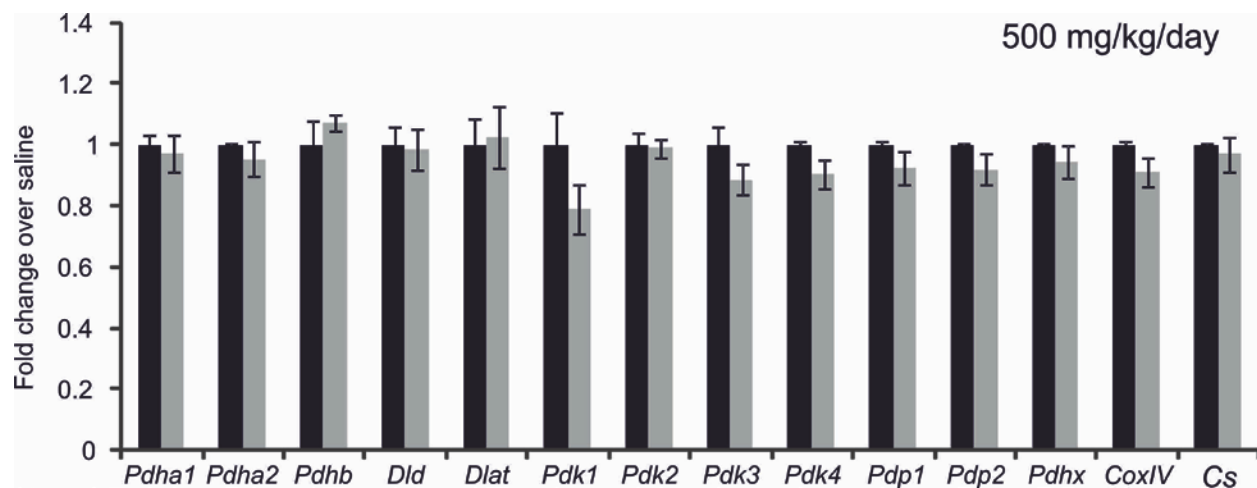

**Fig. S6. Expression of PDHC subunits and regulatory enzymes in muscle. RNA**

concentrations of the subunits (*Pdha1*, *Pdha2*, *Pdhb*, *Dlat*, *Dld*, *Pdhx*), kinases (*Pdk1*, *Pdk2*, *Pdk3*, *Pdk4*), and phosphatases (*Pdp1* and *Pdp2*) of PDHC, *CoxIV*, and citrate synthase (*Cs*) in muscles of mice treated with 500 mg/kg/day of phenylbutyrate or with saline (n=5 per group).

Means  $\pm$  standard deviations are shown.

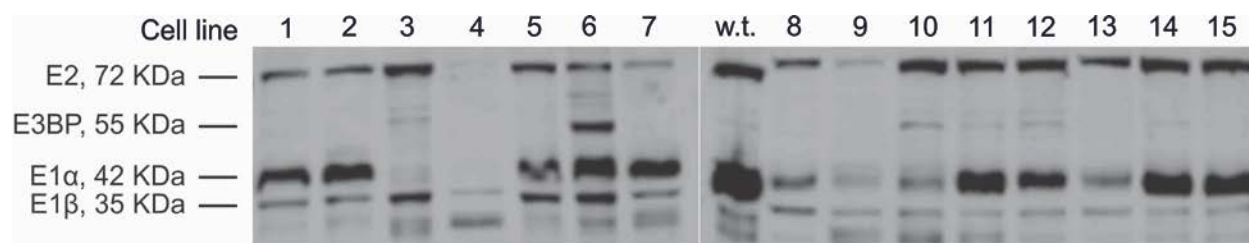

**Figure S7. Western blot for PDHC subunits in PDHC-deficient cells.** The expression of E1 $\alpha$ , E1 $\beta$ , E2, and E3BP was assessed in PDHC-deficient patient cells using a cocktail of antibodies against the components of the complex. Cell line 3 harboring missense mutation p.R349H and cell line 4 with nonsense mutation p.R275\* mutation showed little or no expression of the E1 $\alpha$  protein and failed to respond to phenylbutyrate.

**Supplementary Table 1. Serum concentrations of phenylbutyrate and phenylacetate in mice**

|               | Phenylacetate<br>( $\mu\text{mol/l}$ ) | Phenylbutyrate<br>( $\mu\text{mol/l}$ ) |
|---------------|----------------------------------------|-----------------------------------------|
| Saline        | Undetectable                           | Undetectable                            |
| 250 mg/kg/day | Undetectable                           | Undetectable                            |
| 500 mg/kg/day | 5.26 $\pm$ 2.3                         | 0.9 $\pm$ 2.0                           |

## Supplementary Table 2. Primers for real time PCR in human fibroblast RNA

| Primer  | Sequence                  |
|---------|---------------------------|
| PDHA1_F | CGCAGAGCTTACAGGACGAA      |
| PDHA1_R | CCATTGCCCCCGTAGAAGT       |
| PDHA2_F | GGCGGAGGGGCTTAAATACT      |
| PDHA2_R | AAACCGCGAATGAATTTCTG      |
| PDHB_F  | GGGGCATACAAGGTTAGTCG      |
| PDHB_R  | ATTCCAGCAAAGCCCATCTC      |
| PDK1_F  | CCGCTCTCCATGAAGCAGTT      |
| PDK1_R  | TTGCCGCAGAAACATAAATGAG    |
| PDK2_F  | GATCCAGCAATGCCTGTGAG      |
| PDK2_R  | CGGGAAGCAGGTTGATCTC       |
| PDK3_F  | CAAGCAGATCGAGCGCTACTC     |
| PDK3_R  | CGAAGTCCAGGAATTGTTTGATG   |
| PDK4_F  | CCCGAGAGGTGGAGCATTT       |
| PDK4_R  | GCATTTTCTGAACCAAAGTCCAGTA |
| DLAT_F  | TCCAAC TCCCCAGCCTTTAG     |
| DLAT_R  | GCAAGAGGGCTAACAAACACC     |
| DLD_F   | AAAATGCAGAGCTGGAGTCG      |
| DLD_R   | TGCAGAAAGTCCCTGTAGGC      |
| PDP1_F  | CTGCCACTGTTCTCTGATGC      |
| PDP1_R  | CATGCAGTGCCATAGATCCTG     |
| PDP2_F  | GCAAATGTGTTCTTCAGCA       |
| PDP2_R  | CCGCAGTTGTGGCACTGT        |
| PDHX_F  | CGGGGTGATCCCATTAAGAT      |
| PDHX_R  | AATGCATCTCCAGCACTCAC      |

### Supplementary Table 3. Primers for real time PCR in RNA from mouse tissues

| Primer  | Sequence               |
|---------|------------------------|
| Pdk1_F  | TCCTGTCACCAGCCAAAATG   |
| Pdk1_R  | CCACCGAACAATAAGGAGTGC  |
| Pdk2_F  | TGGTGCAGAGCTGGTATGTC   |
| Pdk2_R  | GGCATCTGTGAACTGGCTTAG  |
| Pdk3_F  | CCTGGACTTCGGAAGGGATA   |
| Pdk3_R  | CTCATGGTGTTAGCCAGTCG   |
| Pdk4_F  | CAGCTGGTGAAGAGCTGGTA   |
| Pdk4_R  | CTCTGACAGGGCTTTCTGGT   |
| Pdha1_F | AAGATGCTTGCCGCTGTATC   |
| Pdha1_R | ATTTGCAAAATTACGGGAAGC  |
| Pdha2_F | GTTGTGCCTCGCGTTTCTC    |
| Pdha2_R | CCTCTGAGAGCTGGCTTTTG   |
| Pdhb_F  | GGAGGGAATTGAATGTGAGG   |
| Pdhb_R  | CCACAGTCACGAGATGATTTG  |
| Pdhx_F  | AGCAAGTTGGAGGTGGTTTC   |
| Pdhx_R  | GTTCCCTTGCTCCATCGTAG   |
| Dlat_F  | AAGTTGGCAGCAGAGAAAGG   |
| Dlat_R  | GGCACAAAAGAGTCAATGTCC  |
| Dld_F   | TCATGGCCTACAAGGAGTTTC  |
| Dld_R   | ATATCCTCCAGGGCCAGAAC   |
| Pdp1_F  | GGAGAAGTGCAGCAACCTG    |
| Pdp1_R  | ACTGACTGCCTGGGAACAAG   |
| Pdp2_F  | ACGAGGATACGAGGCTGAAA   |
| Pdp2_R  | CGATTCCTTGACAGAATTGAAG |
| CoxIV_F | GTGGCAGAATGTTGGCTTC    |
| CoxIV_R | TTCACAACACTCCCATGTGC   |
| Cs_F    | CTCTCCCTTCGGTCCCTTC    |

|                           |                      |
|---------------------------|----------------------|
| Cs_R                      | CGAGGCAGGATGAGTTCTTG |
| $\beta_2$ microglobulin_F | TGGTGCTTGTCTCACTGACC |
| $\beta_2$ microglobulin_R | GTATGTTCGGCTTCCCATTG |
